# Supplementary material
Source: publisher figshare collection journal article supplement (https://gsajournals.figshare.com/ndownloader/files/28102725)
Supplement: Supplementary file 1 [file 28102725]

**Figure S4.** Correlation matrix for untransformed, within-location BLUPs of 15 elemental phenotypes from fresh kernels in the sweet corn association panel. Pearson’s correlation coefficients (*r*) between traits within NY and WI are presented in the upper and lower triangles, respectively. The diagonal represents the correlation of each phenotype between locations. Bolded values correspond to significant correlations (*P*-value ≤ 0.05).
